# Supplementary material for: Knockdown of the ABCG23 Gene Disrupts the Development and Lipid Accumulation of Panonychus citri (Acari/Tetranychidae)
Source: MDPI journal article supplement (doi:10.3390/ijms25020827), 2024-01-09
Supplement: s1 [file s1]

>ABCG23

ACATGGGGAGACGTGGTGAAGCGTTTCTCAAGTCAAAACCTTTTTACTTTCCTTTTTACC  
TTTAGAGAGTAGTGATTTCAACACCATCTTCCTTACCTTTTTCTCTAGATTGTTTGATTA  
ACAAAAGTGACCTGAGGATCGCCAATTTAACTTGAAATCTTTTAACTTTTTTTACTTGT  
TGAATCTTCATCAGCCCCGAAATGGGTGCACCAAAAGATTTAACCGTGTGTAGCAACAAT  
TCGGTAAAAATATCGGTTCCGTGGCAATCACCATCAGCAGCACTTCGTCAACAGTTATCA  
ACTTCATCATCGTTGTACAATCATCTTCATCACTCAACCACCAACAATTCCAATTCTTCG  
TCTTCTCCTGCTACAAATGGACTTGTTATTCGTGGTTTAGGTTATTTGACCAAAAAGAAG  
GAGGAAATTCTGAGGGACATCAACATGACGGTTCCAAAAGGTACAATTTACGGCCTATTG  
GGACCCAGTGGATGTGGTAAACAACCTTTACTTCGTTGTGTCTCGTTCGTTGTCTTCGACCT  
CAATATGGACAAATCATGATTTTTGGTAAACAGCCAGGCCGTGAAACCGCTCAAATTCCT  
GGTACTGGTGTGGGCTATATGCCTCAAGAAAATACGCTCTATGAGAATATGACCATAGAA  
GAAGTTTAAATCTATTATGGTCGAGTATTTTTCTATCGATTGAAGAGCTTTATGAAAGA  
ATCAAAGGATTAATGGGAGTTCTTGAACCTCCGGATAAAGGTGCAATGATCAAAAAGCTC  
AGTGGGGGACAAAAGCGACGTGTTTCTTTCGCTATCGCTCTCATTTCATCGACCAGGTCTC  
TTGATTCTAGATGAACCTACTTCAGGAGTCGATCCTTTATTGAGGGAAAACTTTGGCAA  
CATTTAATGTGCATTTCTAAAAATCAAGGAGCCACAATAATCATAACAACCCATTACATT  
GAAGAGGCTCGCAGGTCACATAATGTGGGCTTCATGAGACAAGGAAGACTTTTAAATGCAA  
GAAGATCCTGATCGCCTTTTAGCAGATCGTGGGGTCGAAACACTGGAAGATGCTTTCTC  
GATATCTGTAGGAATCAAGGTAGAATCAGTTGTGTTCTGAACAAGAAAAGATAGAGTAC  
AAGGGAAATGTTCCAACCTGCAACTTTTCGTCACCGATCCAGTCCTGATTAAGAAACGAATC  
CGCGAATGGTTTTTCATATTCTTTGGTGCCCTTTGGCGACATTTAGTCAGTGATATTCGA  
GAACCTTTGACTATTGGCTTTCAATACGTCATTCCAATTCTGTCCATGTTACTGTTGCC  
CTTTGTATCGGTGGTCAACCATTGACATTCTCTTGAATTGTGAACGAAGAAGTTGGA  
TTTGAAGGATTTTTGGGTGCGACAGTTTGTGGCTCTTTGGATCCTCATCTTTCAATGTT  
TTCAACTATTCGGATCTTAGTGAGGCAGCTGAAGCGGCCAAAGTTTCGTGAAGTTGGGGA  
TATCTCCATATAAAAAGAGGATTCATGAATCGCTATACGATGTTCTGTTTCCCGATAGT  
GAACCACTTAATTCATCAATCCAATCAAGTCATATCAACCTCCATGCCGATCTAACAGAT  
CGAGTAATCACAACCTACGATGCATCGCTATTTAGATGAGTCTTTTATCAGTTTTGTGCAA  
CAGGTTATTAAAGATTACAACAAAGAGGATCCTGATGTCC GAATGCCACAATTTATCGCC  
AATCTTCCAATCAAAAATGGGATCACCGATCTATGGACGATTAGAGAAGAAAAGTTATCGT  
GGTTATCGTGATTTTCATGTTGCCAGGATTAATTGTCAACATAACTTATGCCATTGCCTAT  
TCTCTTACAGCACTTAATCTAATTAATGAGCGTAAAAATCAAACCTTTTCGAGAGAAATTAT  
GTCGCTGGTGTTAAACCTTCGCAAATGTTATTAGCGTTTCG CCCTAAGTCGTGTCATCATG  
ATGTCCCTTTATCTCTTCTTGATCATTATCTTCCCATCGCTGTCTTCAG TATGCCAGTC  
GATTGTATTTCATTTCTTCATTCACTTCCACTTTTGATGC TACTCAATATCTCTGGAATG  
ACCTATGGAATGGTCGTGTCCGCTCTCTGTGATTCAATTGAACAATGTGCCGTTTTCTCG  
GCTGCCACTTTATTTATAATTCTTTTCATGAGTGGAACAATTTGGCCTATGGAAGCAATT  
CCAGCTTATTTCCGTTGGCTGTGTGAATACGCGCCGACAMCGGACGGCCAATGAAGCCCT  
GCGTGATATTTGGTATAAAGATTGGAGTATTTTCTCACCGCGAGTGGCCACCGCTCACGG  
AATTACACTTGTCTGGACATTTGTTTTCTTTTTAATTGGTTAAGATTTTTTAGACTAAG  
CAAATAATTAACCTTCAATTTTTACAAACCATTTTCTTGTAATCATCATCAATCTAACC  
ACCATCGATAATTTTCATCAATCACCATCATTTTTATCACTTTTATATTTTAACTTTTT  
GTAAAACCCAAATGCCAAAGAAAACCTTTTTTTGCATATTCATTGAGCGCAAAAAAATGA

TCAACAATCAACACAAACACACAAACACGTATAAAGAAATTAAAATATGTATTTTTTATA  
TTTATGATTTTAAAATCAAGAAAATAGATTAAAAAAGTTGAGAATTAATCAGTTTTGAAA  
TTAAAAATATAAACGAAAACACATAAAAAAAAAAAAAAAAAAAAAAAAAA
